# Supplementary material for: KCNQ Channels Show Conserved Ethanol Block and Function in Ethanol Behaviour
Source: PLOS journal article supplement (doi:10.1371/journal.pone.0050279), 2012-11-29

Supporting Figure 1, Cavaliere et al.

A

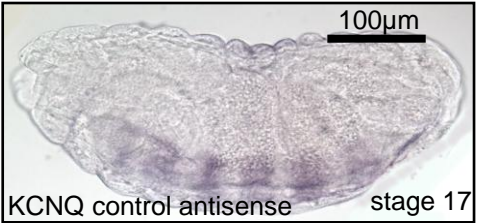

B

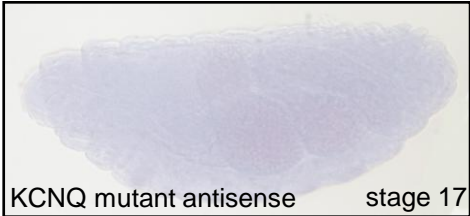

C

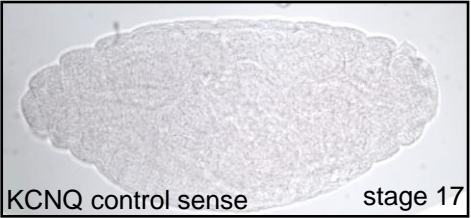

D

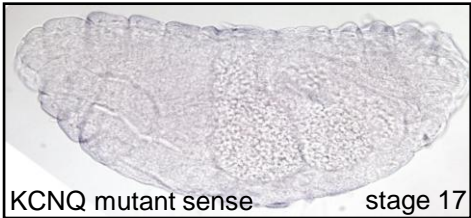

Supplement: S1 (10.1371/journal.pone.0050279.s001) [file journal.pone.0050279.s001]
